# Supplementary material for: Mindfulness Processes that Mitigate COVID-Related Stressors in Caregivers in the United States
Source: Springer Nature journal article supplement (doi:10.1007/s10826-023-02681-2), 2023-11-30
Supplement: MOESM1 [file 26476754]

**Supplementary Materials**

**Multiple Linear Regressions (Full Models Reporting Covariates)**

Multiple linear regression models were used to test mindfulness processes taken at baseline as moderators of the association between COVID-related stressors and caregiver stress related to such exposure, both taken one month later. Caregiver age, gender, race/ethnicity, education level, income, household chaos, caregiver depressive symptoms, and number of children in the household by age group were included as covariates. Self-compassion, nonreactivity, nonjudging, and acting with awareness were tested as moderators in separate models to disentangle which mindfulness processes were strongest in buffering the association between COVID-related stressors and caregiver stress. In other words, interaction terms were tested separately rather than in a step-wise, hierarchical fashion. Using *β* as an effect size estimator, the following interpretations were used: less than 0.20 is a weak effect size, between 0.20 and 0.50 as a moderate effect size, and greater than 0.50 as a large effect (Acock, 2014).

To examine the relation between participants’ COVID-related stressors and their associated stress one month later, as well as whether mindfulness processes moderated this relation, we conducted multiple regression analysis with caregiver stress scores as the dependent variable. Follow-up simple slope analyses were conducted to probe significant interactions. Model 1 examined the impact of the covariates alone (caregiver age, gender, race/ethnicity, education level, income, household chaos, depressive symptoms, and number of children in the household by age group) on caregiver stress. Model 2 added the impact of COVID-related stressors and Model 3 added the impact of mindfulness processes—self-compassion scale, nonreactivity, nonjudging, and acting with awareness. Models 4-7 added the interaction between COVID-related stressors and each of the four mindfulness processes individually (self-compassion, nonreactivity, nonjudging, and acting with awareness). Model 8 included all interactions between COVID-related stressors and the mindfulness processes in addition to the impact of predictors. Table 2 displays the results of the regression analysis.

Model 1 showed that more chaotic family environments (*β=*0.05) and higher depressive symptoms (*β=*0.12) predicted higher caregiver stress. There was a significant difference in the amount of variance of caregiver stress explained by Model 1 over the base model (Δ*R*2=0.333, *F*(21, 307)=7.33, *p*<.001). Model 2 showed that more COVID-related stressors (*β=*0.27), more household chaos (*β=*0.05) and higher depressive symptoms (*β=*0.12) predicted higher caregiver stress. When COVID-related stressors was added in Model 2, we found this significantly improved the fit of the model, (Δ*R*2=0.100, *F*(1, 306)=53.94, *p*<.001). In Model 3, more household chaos (*β=*0.04), higher depressive symptoms (*β=*0.09) and more COVID-related stressors (*β=*0.27) predicted higher caregiver stress. When mindfulness processes were added in Model 3, we found this significantly improved the fit of the model, (Δ*R*2=0.021, *F*(4, 302)=2.93, *p*=.021).

Model 4 included the COVID-related stressors X self-compassion interaction term, which significantly improved the fit of the model (Δ*R*2=0. 001, *F*(1, 301)=3.49, *p*=.063). There was a significant main effects of household chaos (*β=*0.04), depressive symptoms (*β=*0.09), and COVID-related stressors (*β=*0.54) on caregiver stress.

Model 5 included the COVID-related stressors X nonreactivity interaction term, which did not significantly improve the fit of the model over Model 3 (Δ*R*2=0. 00, *F*(1, 301)=0.22, *p*=.882). There were significant main effects of household chaos (*β=*0.04), depressive symptoms (*β=*0.09) on caregiver stress.

Model 6 included the COVID-related stressors X non-judgmental interaction term, which did not significantly improve the fit of the model over Model 3 (Δ*R*2=0. 002, *F*(1, 301)=1.05, *p*=.307). There were significant main effects of household chaos (*β=*0.04), depressive symptoms (*β=*0.09), and COVID-related stressors (*β=*0.40) on caregiver stress.

Model 7 included the COVID-related stressors X acting with awareness interaction term, which significantly improved the fit of the model over Model 3 (Δ*R*2=0. 022, *F*(1, 301)=12.60, *p*=<.001). There was a significant interaction effect between COVID-related stressors X acting with awareness (*β=*-0.15), in addition to main effects of household chaos (*β=*0.04), depressive symptoms (*β=*0.09), and COVID-related stressors (*β=*0.73) on caregiver stress (see Figure 1). Simple slopes analysis suggested that for caregivers with low levels of acting with awareness, each unit increase in COVID-related stressors resulted in a larger increase in caregiver stress (*b*=0.36, 95% *CI* [0.28-0.45]) than for caregivers with high levels of acting with awareness (*b*=0.13, 95% *CI* [0.02-0.24]). The slope of COVID-related stressors on caregiver stress for caregivers with low levels of acting with awareness is significantly larger than for caregivers with high levels of acting with awareness (*β*=-0.24, *SE*=.07, *t*=-3.55, *p*<.001).

Model 8 included all the COVID-related stressors X mindfulness processes interaction terms, which significantly improved the fit of the model over Model 3 (Δ*R*2=0. 026, *F*(4, 298)=3.73, *p*=.006), over Model 4 (Δ*R*2=0. 020, *F*(3, 298)=3.78,, *p*=.011), but not over Model 7 (Δ*R*2=0. 004, *F*(3, 298)=.78, *p*=.502). There was a significant interaction effect between COVID-related stressors X acting with awareness (*β=*-0.19), in addition to main effects of acting with awareness (*β=*0.23), household chaos (*β=*0.04), depressive symptoms (*β=*0.09), and COVID-related stressors (*β=*0.83) on caregiver stress. Simple slopes analysis suggested that for caregivers with low levels of acting with awareness, each unit increase in COVID-related stressors resulted in a larger increase in caregiver stress (*b*=0.42, 95% *CI* [0.30-0.53]) than for caregivers with high levels of acting with awareness (*b*=0.07, 95% *CI* [-0.07-0.21]), which was not significantly related. The slope of COVID-related stressors on caregiver stress for caregivers with low levels of acting with awareness is significantly larger than for caregivers with high levels of acting with awareness (*β*=-0.35, *SE*=0.10, *t*=-3.32, *p*=.001).

***Comparing Models.***

We compared the nine models using Akaike Information Criterion (*AIC*). A comparison of model *AICs* (see Table 2) revealed Model 7, which included only one interaction term (COVID-related stressors X acting with awareness, *AIC*= 679.75) provided the best fit compared to all other models tested.

**Table 1.**

*Linear Regression Analyses for Predictors of Caregiver Stress (full models including covariates)*

|  | Model 1 | | Model 2 | | Model 3 | | Model 4 | | Model 5 | | Model 6 | | Model 7 | | Model 8 | |
| --- | --- | --- | --- | --- | --- | --- | --- | --- | --- | --- | --- | --- | --- | --- | --- | --- |
|  | *β(SE)* | *p* | *β(SE)* | *p* | *β(SE)* | *p* | *β(SE)* | *p* | *β(SE)* | *p* | *β(SE)* | *p* | *β(SE)* | *p* | *β(SE)* | *p* |
| Constant | 2.21(.34) | <.001 | 1.81(.32) | <.001 | 2.61(.41) | <.001 | 2.32(.43) | <.001 | 2.58(.44) | <.001 | 2.44(.44) | <.001 | 2.01(.43) | <.001 | 1.87(.49) | <.001 |
| Covariates |  |  |  |  |  |  |  |  |  |  |  |  |  |  |  |  |
| Caregiver Age | -0.01(.01) | .208 | -0.01(.01) | .288 | -0.01(.01) | .354 | -0.01(.01) | .349 | -0.01(.01) | .356 | -0.01(.01) | .353 | -0.00(.01) | .420 | -0.00(.01) | .482 |
| Caregiver Gender (Female) | -0.11(.09) | .225 | -0.01(.08) | .832 | -0.05(.08) | .549 | -0.04(.08) | .674 | -0.05(.08) | .547 | -0.04(.08) | .621 | -0.01(.08) | .918 | -0.01(.08) | .877 |
| Race/Ethnicity (White) | 0.12(.10) | .226 | 0.14(.09) | .125 | 0.15(.09) | .114 | 0.16(.09) | .098 | 0.15(.09) | .114 | 0.16(.09) | .089 | 0.16(.09) | .084 | 0.15(.09) | .104 |
| Caregiver Education (high school) |  |  |  |  |  |  |  |  |  |  |  |  |  |  |  |  |
| Some high school | -0.41(.55) | .451 | -0.64(.51) | .209 | -0.67(.50) | .183 | -0.67(.50) | .181 | -0.67(.50) | .185 | -0.62(.50) | .218 | -0.62(.49) | .207 | -0.63(.50) | .208 |
| Some college | 0.09(.17) | .600 | 0.02(.16) | .895 | 0.02(.16) | .906 | 0.02(.16) | .917 | 0.02(.16) | .907 | 0.03(.16) | .866 | 0.01(.16) | .924 | 0.01(.16) | .974 |
| Associate’s or Technical degree | 0.01(.18) | .972 | -0.07(.17) | .694 | -0.06(.17) | .720 | -0.06(.16) | .719 | -0.06(.17) | .725 | -0.05(.17) | .751 | -0.07(.16) | .666 | -0.07(.16) | .649 |
| Bachelor’s degree | 0.07(.16) | .657 | -0.02(.15) | .881 | -0.02(.14) | .893 | -0.01(.14) | .918 | -0.02(.14) | .895 | -0.02(.14) | .902 | -0.03(.14) | .849 | -0.03(.14) | .815 |
| Advanced degree | 0.10(.17) | .548 | 0.05(.16) | .765 | 0.05(.16) | .746 | 0.07(.16) | .670 | 0.05(.16) | .740 | 0.05(.16) | .746 | 0.04(.16) | .787 | 0.04(.16) | .797 |
| Family Income (<$20k) |  |  |  |  |  |  |  |  |  |  |  |  |  |  |  |  |
| $20-34.9k | 0.15(.21) | .480 | 0.12(.20) | .556 | 0.11(.20) | .583 | 0.08(.20) | .683 | 0.10(.20) | .598 | 0.12(.20) | .528 | 0.11(.19) | .556 | 0.09(.20) | .663 |
| $35-49.9k | 0.07(.21) | .749 | 0.09(.20) | .615 | 0.14(.20) | .481 | 0.12(.20) | .541 | 0.14(.20) | .496 | 0.16(.20) | .430 | 0.17(.19) | .380 | 0.15(.20) | .452 |
| $50-74.9k | 0.07(.19) | .709 | 0.08(.18) | .672 | 0.08(.18) | .671 | 0.06(.18) | .739 | 0.07(.18) | .689 | 0.10(.18) | .563 | 0.10(.17) | .587 | 0.05(.18) | .772 |
| $75-$99.9k | -0.23(.20) | .252 | -0.22(.18) | .229 | -0.22(.19) | .246 | -0.23(.19) | .217 | -0.22(.19) | .244 | -0.19(.19) | .316 | -0.18(.18) | .336 | -0.21(.19) | .255 |
| $100-124.9k | -0.09(.21) | .665 | -0.07(.20) | .725 | -0.08(.19) | .691 | -0.11(.19) | .572 | -0.08(.20) | .678 | -0.05(.20) | .797 | -0.07(.19) | .731 | -0.11(.20) | .590 |
| $125-149.9k | -0.22(.22) | .321 | -0.22(.21) | .288 | -0.25(.21) | .231 | -0.26(.20) | .199 | -0.25(.21) | .229 | -0.21(.21) | .321 | -0.21(.20) | .299 | -0.26(.21) | .214 |
| >$150k | -0.26(.24) | .265 | -0.22(.22) | .323 | -0.20(.22) | .349 | -0.24(.22) | .284 | -0.21(.22) | .344 | -0.17(.22) | .436 | -0.20(.21) | .349 | -0.26(.22) | .239 |
| #Children 0-2 years in household | -0.19(.11) | .089 | -0.18(.10) | .082 | -0.17(.10) | .085 | -0.16(.10) | .120 | -0.17(.10) | .087 | -0.17(.10) | .097 | -0.13(.10) | .205 | -0.12(.10) | .246 |
| #Children 3-5 years in household | -0.09(.09) | .287 | -0.05(.08) | .556 | -0.04(.08) | .595 | -0.05(.08) | .499 | -0.04(.08) | .590 | -0.05(.08) | .567 | -0.05(.08) | .530 | -0.05(.08) | .545 |
| #Children 6-12 years in household | -0.01(.06) | .877 | -0.03(.05) | .544 | -0.02(.05) | .723 | -0.02(.05) | .755 | -0.02(.05) | .728 | -0.02(.05) | .756 | -0.01(.05) | .904 | -0.00(.05) | .979 |
| #Children 13-18 years in household | -0.03(.07) | .652 | -0.04(.06) | .557 | -0.04(.06) | .516 | -0.04(.06) | .492 | -0.04(.06) | .520 | -0.04(.06) | .500 | -0.04(.06) | .506 | -0.03(.06) | .568 |
| Household Chaos | 0.05(.01) | <.001 | 0.05(.01) | <.001 | 0.04(.01) | .001 | 0.04(.01) | .002 | 0.04(.01) | .001 | 0.04(.01) | .001 | 0.04(.01) | .002 | 0.04(.01) | .001 |
| CES-D | 0.12(.02) | <.001 | 0.12(.02) | <.001 | 0.09(.02) | <.001 | 0.09(.02) | <.001 | 0.09(.02) | <.001 | 0.09(.02) | <.001 | 0.09(.02) | <.001 | 0.09(.02) | <.001 |
| Predictors |  |  |  |  |  |  |  |  |  |  |  |  |  |  |  |  |
| COVID SE |  |  | 0.27(.04) | <.001 | 0.27(.04) | <.001 | 0.54(.15) | <.001 | 0.29(.16) | .065 | 0.40(.13) | .003 | 0.73(.13) | <.001 | 0.83(.23) | <.001 |
| SCS |  |  |  |  | -0.09(.07) | .233 | -0.02(.09) | .845 | -0.09(.07) | .233 | -0.09(.07) | .205 | -0.07(.07) | .339 | -0.13(.11) | .228 |
| FFMQ NR |  |  |  |  | -0.03(.06) | .675 | -0.04(.06) | .558 | -0.02(.09) | .854 | -0.03(.06) | .612 | -0.07(.06) | .274 | 0.02(.10) | 862 |
| FFMQ NJ |  |  |  |  | -0.09(.05) | .115 | -0.09(.05) | .095 | -0.09(.06) | .115 | -0.03(.08) | .730 | -0.09(.05) | .089 | -0.16(.09) | .077 |
| FFMQ AA |  |  |  |  | -0.02(.06) | .715 | -0.02(.06) | .734 | -0.02(.06) | .707 | -0.02(.06) | .667 | -0.15(.07) | .041 | 0.23(.09) | .015 |
| COVID SE X SCS |  |  |  |  |  |  | -0.08(.04) | .063 |  |  |  |  |  |  | 0.06(.07) | .376 |
| COVID SE X FFMQ NR |  |  |  |  |  |  |  |  | -0.01(.05) | .882 |  |  |  |  | -0.07(.06) | .244 |
| COVID SE X FFMQ NJ |  |  |  |  |  |  |  |  |  |  | -0.04(.04) | .307 |  |  | 0.04(.05) | .347 |
| COVID SE X FFMQ AA |  |  |  |  |  |  |  |  |  |  |  |  | -0.13(.04) | <.001 | -0.19(.06) | .001 |
| Adj *R*2 | ﻿0.288 | | ﻿0.393 | | ﻿0.408 | | ﻿0.413 | | ﻿0.406 | | ﻿0.408 | | ﻿0.430 | | 0.429 | |
| *AIC* | 747.18 | | 695.77 | | 691.24 | | 689.45 | | 693.22 | | 692.10 | | 679.75 | | 683.15 | |

*Note*. CES-D=Center for Epidemiologic Studies Depression Scale. COVID SE=COVID-related Stressors. SCS=Self-Compassion Scale. FFMQ=Five Facet Mindfulness Questionnaire. NR=Nonreactivity. NJ=Nonjudging. AA=Acting with Awareness
